# Supplementary material
Source: PubMed Central journal article supplement (PMC5865033)
Supplement: IAI.00889-17_zii999092344s1.pdf [file IAI.00889-17_zii999092344s1.pdf]

1 **Table S1** Percent infection rate of “*Ca. L. asiaticus*” and *Wolbachia* and mean copy number of  
 2 non-exposed *Diaphorina citri* using qPCR in both nymphs and adults, including individual guts  
 3 and whole bodies<sup>1</sup>

| Non-Exposed             |                          |                             |             |             |                          |
|-------------------------|--------------------------|-----------------------------|-------------|-------------|--------------------------|
|                         | Stage                    | Bacteria                    | Ct < 35 (%) | Ct > 35 (%) | Mean Copy # <sup>2</sup> |
| Whole Body <sup>1</sup> | Nymph (5 <sup>th</sup> ) | " <i>Ca. L. asiaticus</i> " | 0.0         | 100.0       | 0.0                      |
|                         |                          | <i>Wolbachia</i>            | 100.0       | 0.0         | 110062.8                 |
|                         | Adult                    | " <i>Ca. L. asiaticus</i> " | 0.0         | 100.0       | 0.0                      |
|                         |                          | <i>Wolbachia</i>            | 100.0       | 0.0         | 201125.9                 |
| Gut <sup>3</sup>        | Nymph (5 <sup>th</sup> ) | " <i>Ca. L. asiaticus</i> " | 0.0         | 100.0       | 0.0                      |
|                         |                          | <i>Wolbachia</i>            | 100.0       | 0.0         | 64300.1                  |
|                         | Adult                    | " <i>Ca. L. asiaticus</i> " | 0.0         | 100.0       | 0.0                      |
|                         |                          | <i>Wolbachia</i>            | 100.0       | 0.0         | 1506884.8                |

4  
 5 <sup>1</sup>Each sample was tested for both “*Ca. L. asiaticus*” and *Wolbachia* titer. For each life stage, 30  
 6 samples were used and each sample had three technical replicates which were averaged for a final  
 7 Ct-value. Those samples with an average technical replicate value of Ct < 35 contributed to the  
 8 percent infection rate, (e.g. whole body nymphs tested had 21/30 samples with Ct < 35, or 70%  
 9 “*Ca. L. asiaticus*” infection rate). Since all these samples are non-exposed it is expected that all  
 10 would be 100% uninfected (Ct > 40) for “*Ca. L. asiaticus*”.

11 <sup>2</sup>Mean copy number is the average of individual sample copy numbers with Ct < 35. Cycle  
 12 threshold values was converted to copy number using a standard curve.

13 <sup>3</sup>The individuals used for guts and whole bodies were taken from separate generations of the same  
14 colonies. Exposed nymphs and adults were fed on “*Ca. L. asiaticus*”-infected citrus trees for one  
15 or more generations.

16

17

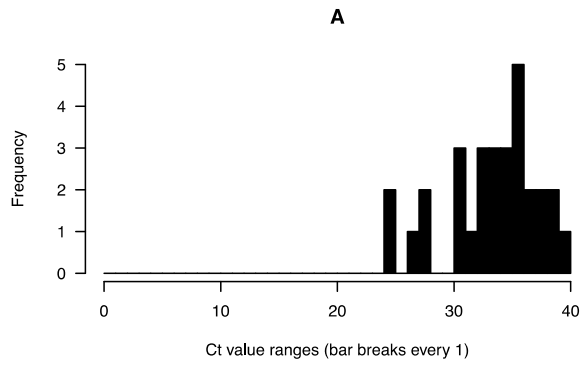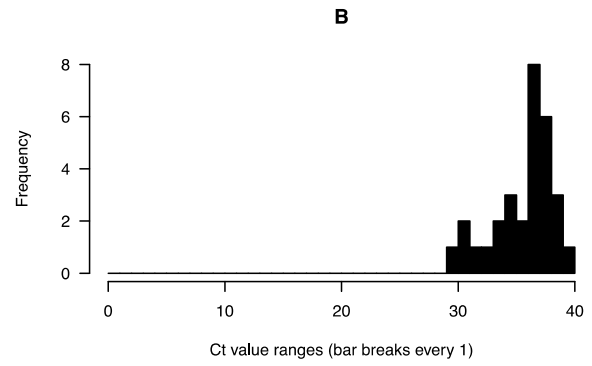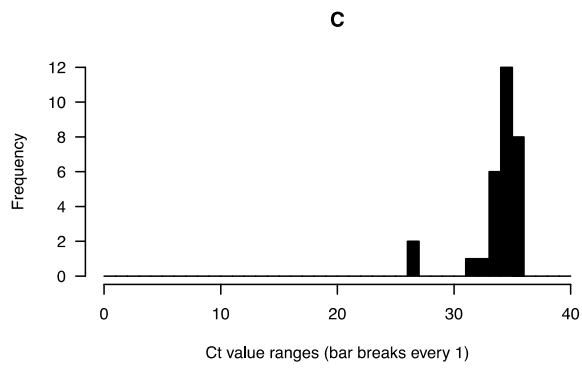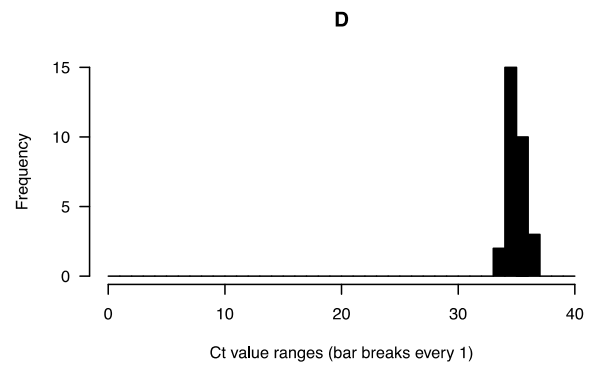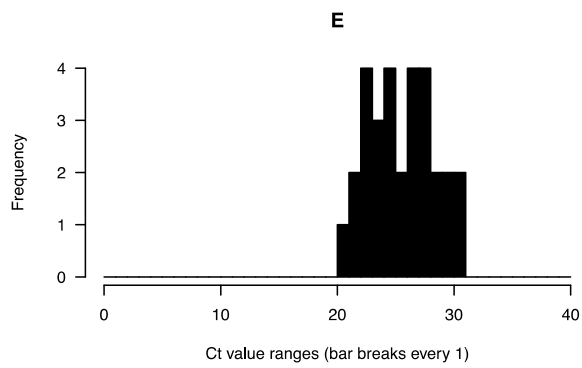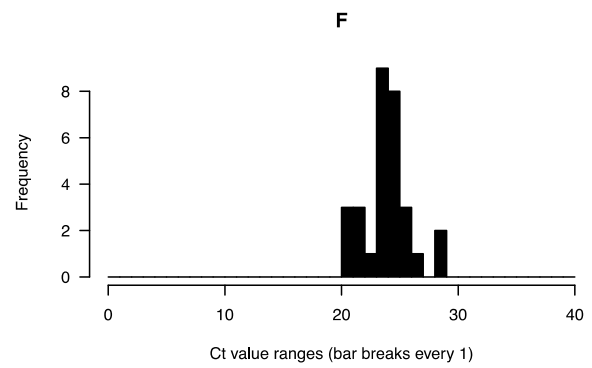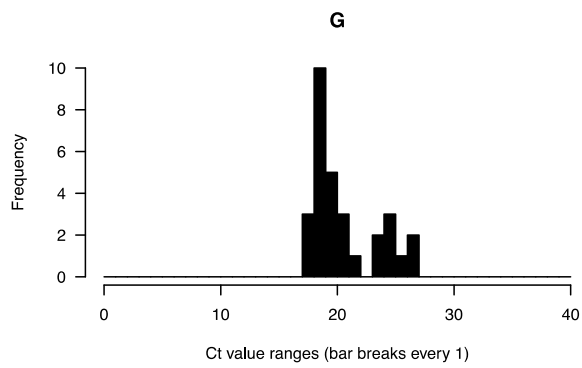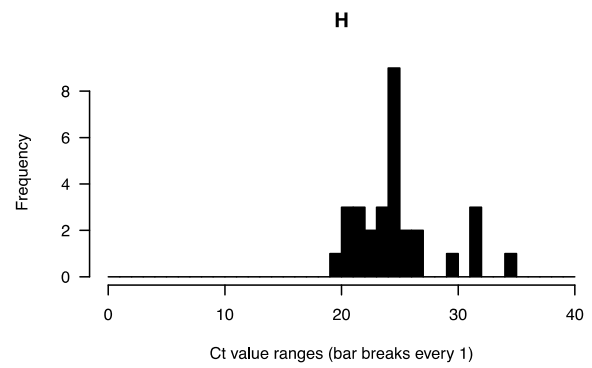

19 **FIG S1** Frequency histograms of both “*Ca. L. asiaticus*” Ct-values and *Wolbachia* Ct values for  
 20 “*Ca. L. asiaticus*”-exposed samples. The frequency of samples with Ct below 35 is visible for each  
 21 treatment. The y-axis is frequency (or the number of samples falling within each given range of  
 22 data values), while the x-axis is the range of Ct values from 0-40. The number of bars was chosen  
 23 to show optimal data distribution. Graphs A-D are “*Ca. L. asiaticus*” Ct values, while graphs E-H  
 24 are *Wolbachia* Ct values from only “*Ca. L. asiaticus*”(+) samples. Graphs A-B and E-F are gut  
 25 samples (showing adults and nymphs, respectively), while graphs C-D and G-H are whole body  
 26 samples (showing adults and nymphs, respectively).

27

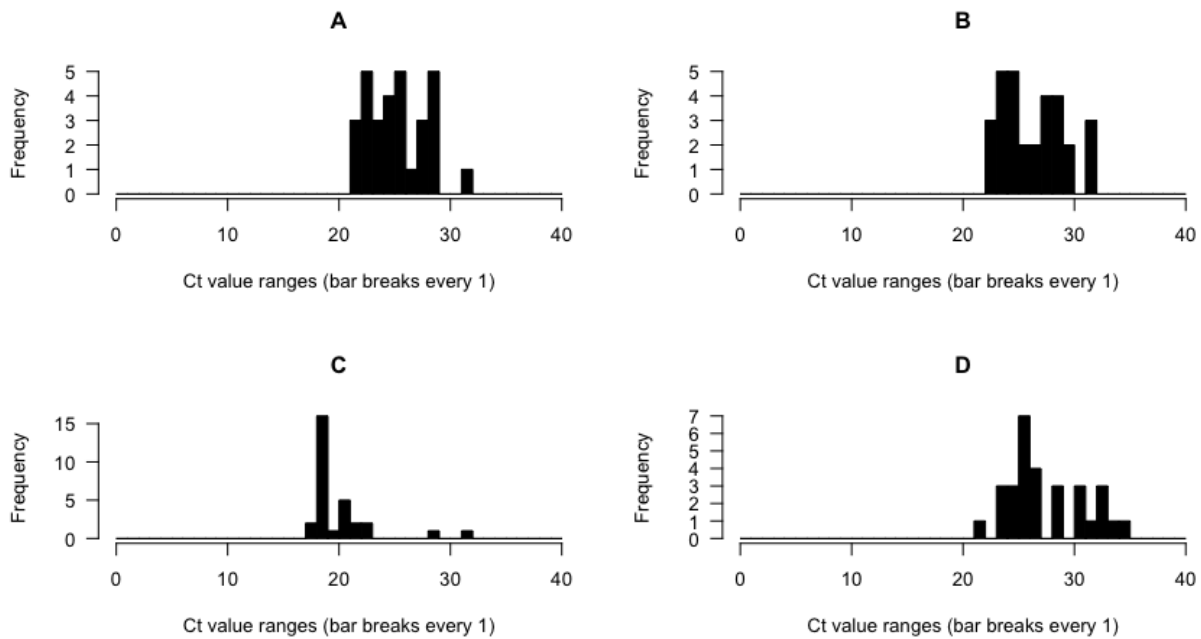

28

29 **FIG S2** Frequency histograms of *Wolbachia* Ct values in non-exposed samples used in the Mann-  
 30 Whitney-U statistical test. The frequency of samples with Ct below 35 is visible for each treatment.  
 31 The y-axis is frequency (or the number of samples falling within each given range of data values),  
 32 while the x-axis is the total range of Ct values displayed by the data. The number of bars was

33 chosen to show optimal data distribution. Graphs A-B are whole body (adults and nymphs,  
34 respectively), while graphs C-D are guts (adults and nymphs, respectively).

35

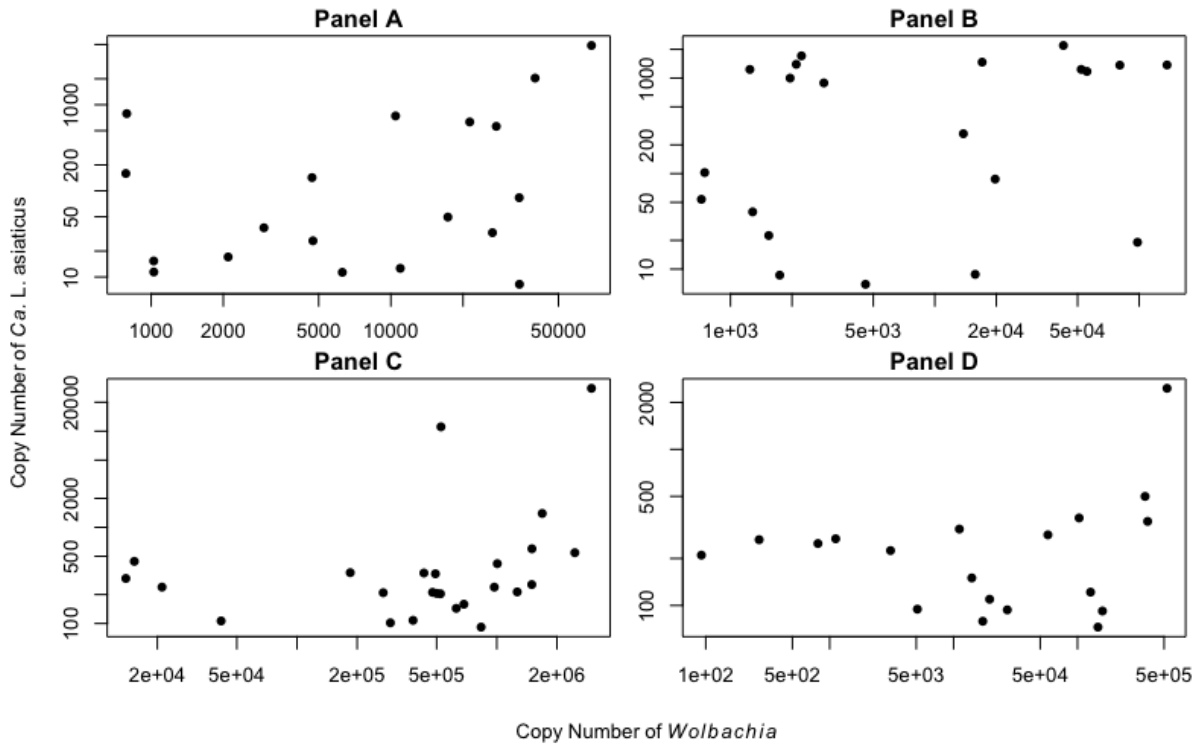

36

37 **FIG S3** Distribution of “*Ca. L. asiaticus*” and *Wolbachia* copy numbers in “*Ca. L. asiaticus*”(+)   
38 adult guts (panel A), “*Ca. L. asiaticus*”(+) nymph guts (panel B), “*Ca. L. asiaticus*”(+) whole body   
39 adults (panel C) and “*Ca. L. asiaticus*”(+) whole body nymphs (panel D). The y-axis is individual   
40 “*Ca. L. asiaticus*” copy number, and the x-axis is individual *Wolbachia* copy number, and both   
41 axes are log scale. (Panel A,  $p < 0.05$ ,  $cor = 0.56$ ; Panel B,  $p < 0.05$ ,  $cor = 0.77$ ; Panel C,  $p < 0.05$ ,   
42  $cor = 0.76$ ; Panel D,  $p = 0.49$ ,  $cor = 0.16$ ).

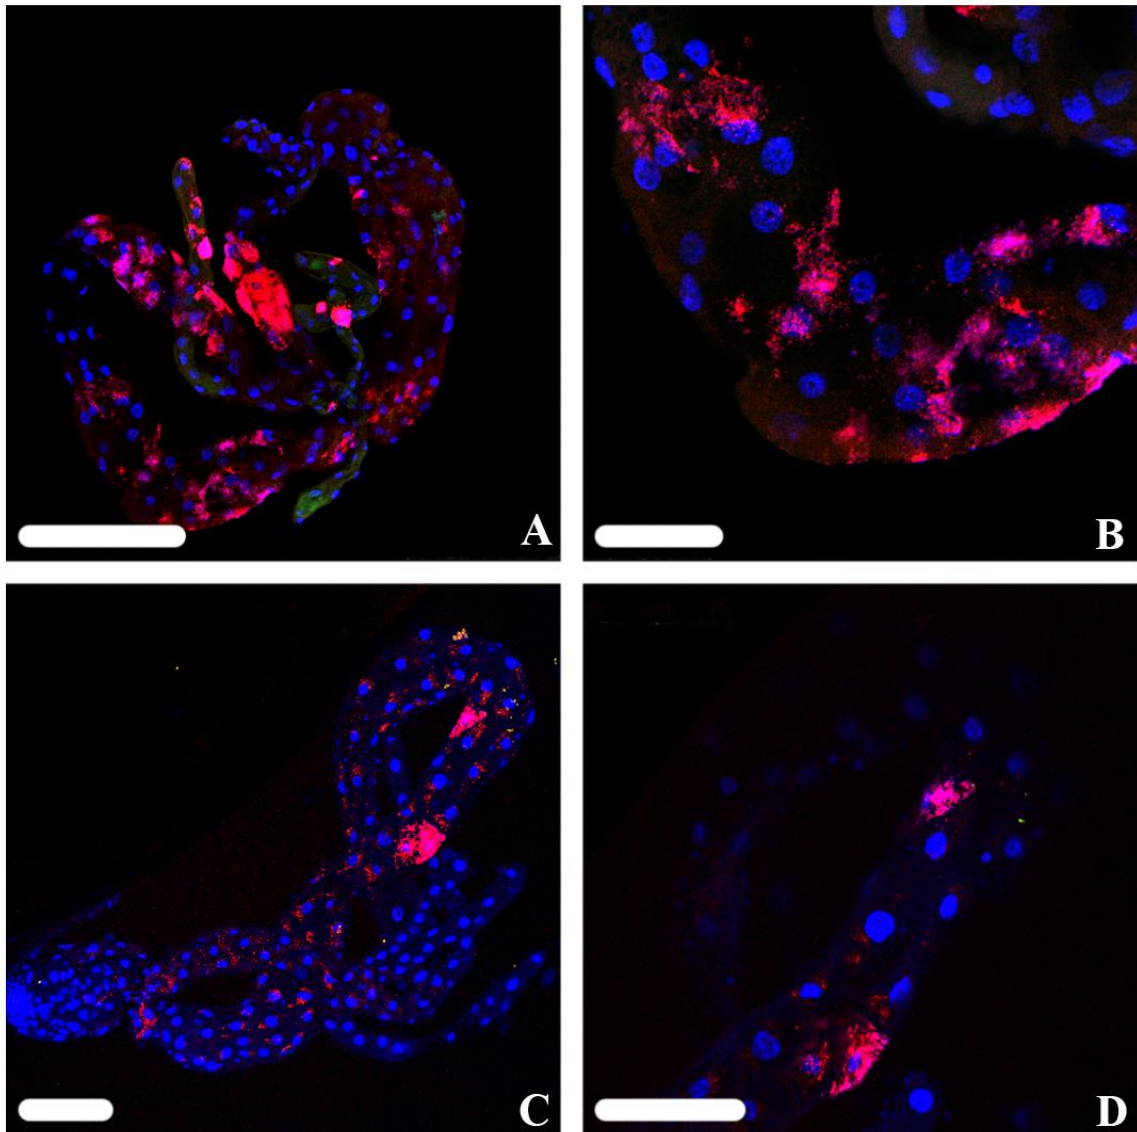

43

44 **FIG S4** Localization of *Wolbachia* (red) in non-exposed *D. citri* gut cells with DAPI staining of  
45 nuclei (blue). Non-exposed adult guts (A-B) and non-exposed nymph guts (C-D) are stained using  
46 Fluorescent *in situ* Hybridization (FISH). The scale bar lengths are as follows: A, C: 250 μm and  
47 B, D: 75 μm.

48
